# Supplementary material for: Suppression of Tumor Growth, Metastasis, and Signaling Pathways by Reducing FOXM1 Activity in Triple Negative Breast Cancer
Source: Cancers (Basel). 2020 Sep 19;12(9):2677. doi: 10.3390/cancers12092677 (PMC7565743; doi:10.3390/cancers12092677)
Supplement: Supplementary file 1 [file cancers-12-02677-s001.pdf]

# Supplementary Materials: Suppression of Tumor Growth, Metastasis, and Signaling Pathways by Reducing FOXM1 Activity in Triple Negative Breast Cancer

Parama Dey, Alexander Wang, Yvonne Ziegler, Sung Hoon Kim, Dorraya El-Ashry, John A. Katzenellenbogen and Benita S. Katzenellenbogen

**Supplementary Table S1 – Antibodies used in these studies**

| Antibody | Source          | Dilution |
|----------|-----------------|----------|
| FOXM1    | CST D12D5       | 1:500    |
| SNAIL    | CST ( C15D3)    | 1:750    |
| SLUG     | CST (C19G7)     | 1:750    |
| VIMENTIN | CST (D21H3)     | 1:1000   |
| ACTIN    | Sigma (A2228)   | 1:5000   |
| MMP2     | AbCam (ab37150) | 1:1000   |

## Supplementary Figure S1

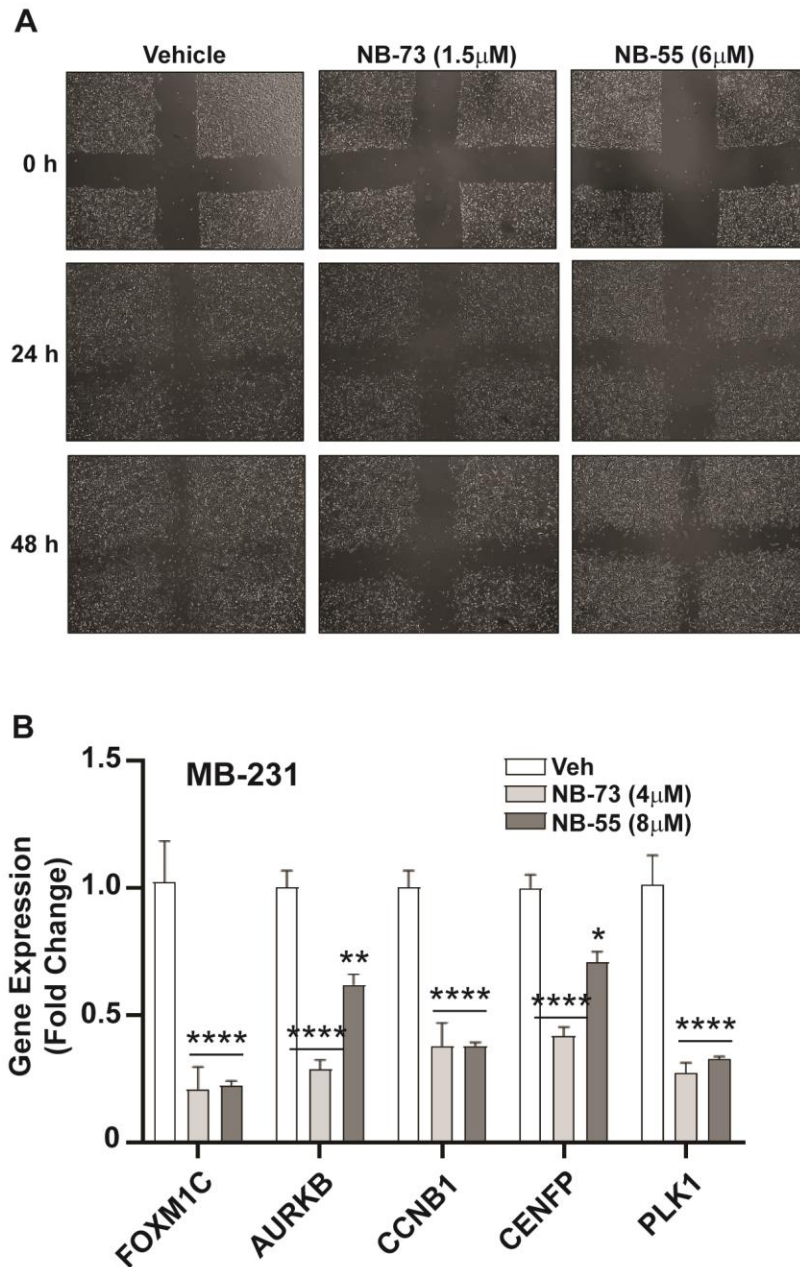

**Fig. S1. Effect of FOXM1 inhibitors on motility of MDA-MB-231 cells evaluated by Scratch Assay and effects on FOXM1 target gene expression**

(A) Cells ( $3 \times 10^5$  MDA-MB-231 cells) were seeded in each well of a 6 well plate and grown to confluence. Then intersecting vertical and horizontal scratches were made on the cell layer using 20  $\mu$ l tips followed by replacement of media with 5% serum containing either vehicle or FOXM1 inhibitory compounds. Images were captured at 0 h, 24 h, and 48 h post-treatment using Evos XL Core Cell Imaging system at 4X magnification. (B) MB-231 cells were treated for 24 h with 4  $\mu$ M NB-73 or 8  $\mu$ M NB-55 followed by RNA extraction and q-PCR analysis of FOXM1 and FOXM1 target gene expressions. Statistical analysis used 2-way ANOVA and \* $p < 0.05$ , \*\* $p < 0.01$ , \*\*\* $p < 0.001$ , and \*\*\*\* $p < 0.0001$  are indicated; mean  $\pm$  SEM.

## Supplementary Figure S2

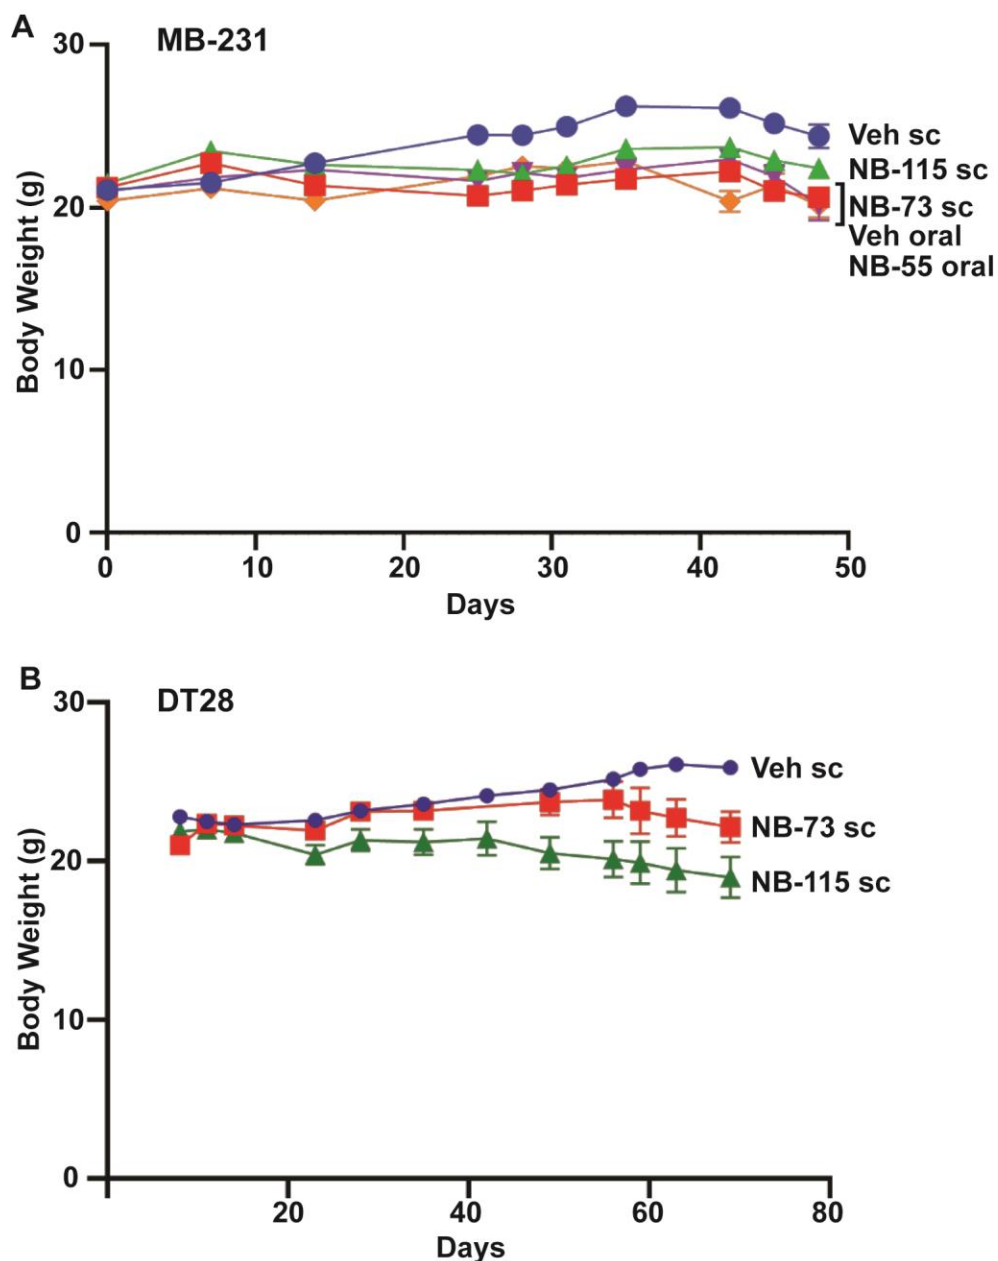

**Fig. S2. Body weights of vehicle and compound treated animals during the time course of tumor studies with MDA-MB-231 and DT28 cells.**

Body weights of NSG mice carrying (A) MB-231 or (B) DT28 tumors were measured biweekly during treatments sc with vehicle or NB-73 and NB-115, or by oral gavage with vehicle or NB-55. Values are mean  $\pm$  SEM. Error bars are not visible for some points because they are smaller than the point symbol. Note that the x-axis scale (time in days) is different in Panels A and B.

# Supplementary Figure 3A

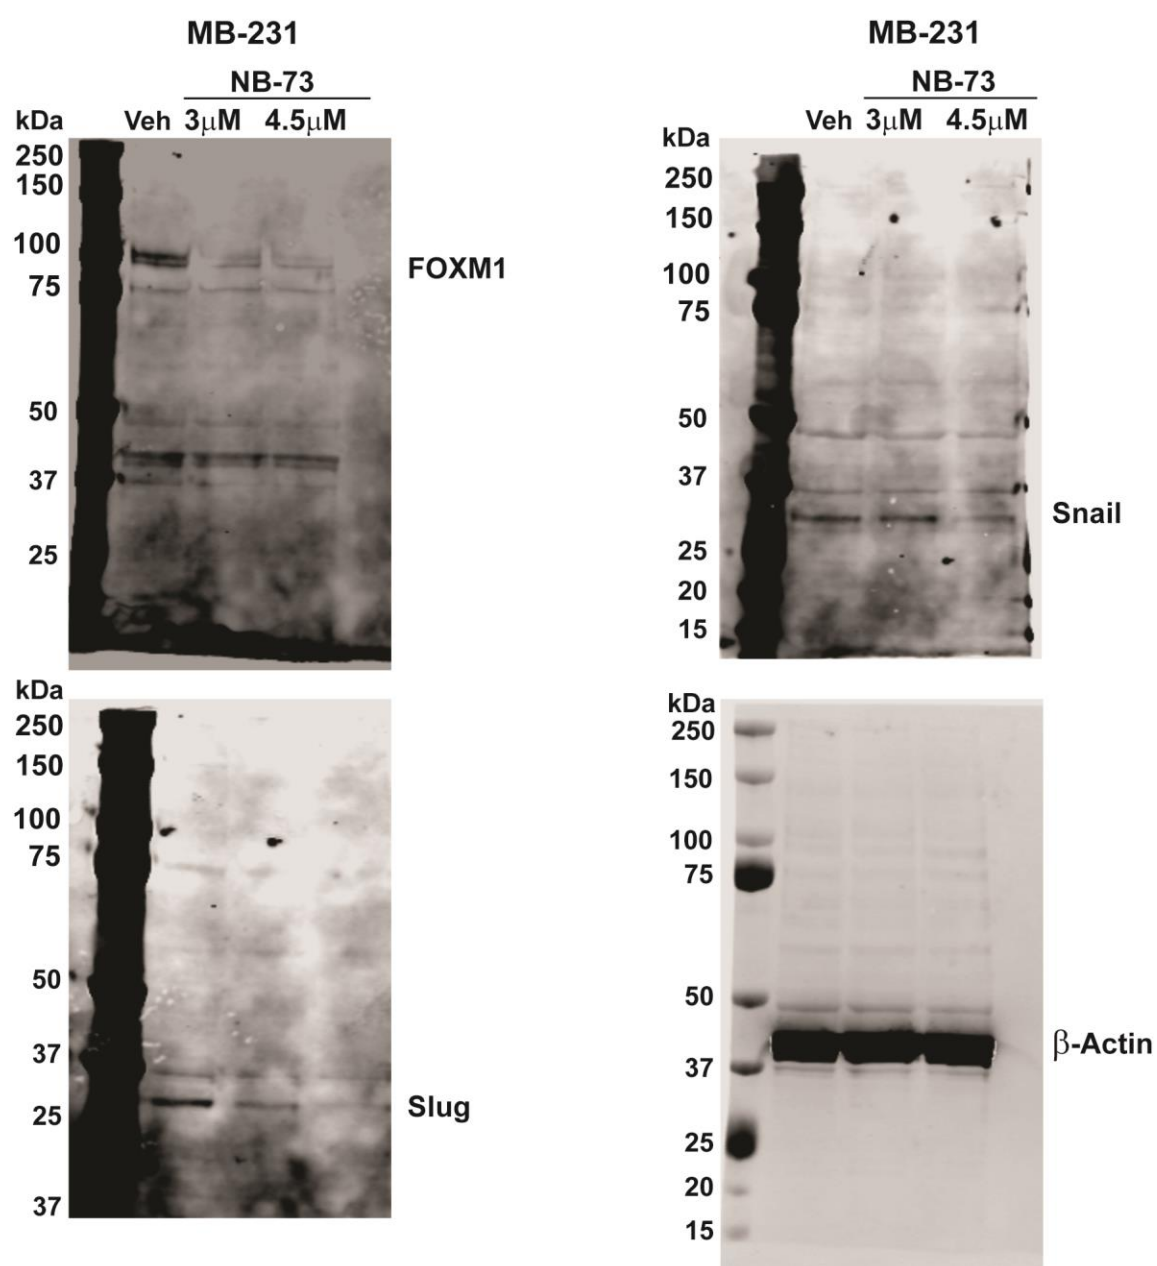

**Fig. S3A. Full Western Blots for the proteins shown in Figure 4A (left).** MB-231 cells were treated with vehicle or compound NB-73 at the concentrations indicated and blots were probed with antibody for the protein indicated. Molecular weight markers are shown in the left-most lane with their kDa noted.

### Supplementary Figure 3B

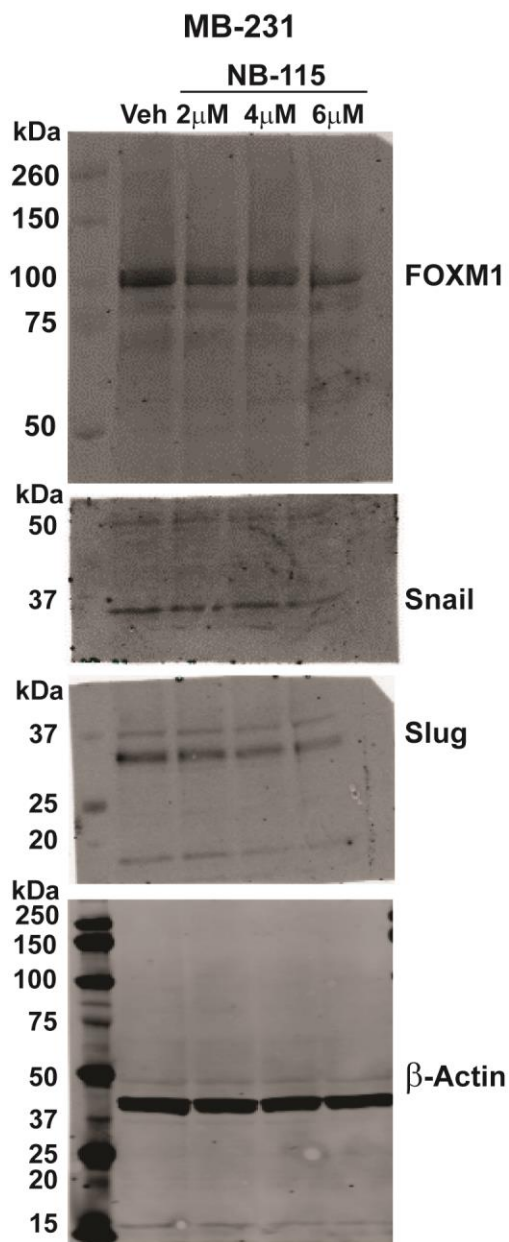

**Fig. S3B. Full Western Blots for the proteins shown in Figure 4A (right).** MB-231 cells were treated with vehicle or compound NB-115 at the concentrations indicated and blots were probed with antibody for the protein indicated. Molecular weight markers are shown in the left-most lane with their kDa noted.

# Supplementary Figure 4A

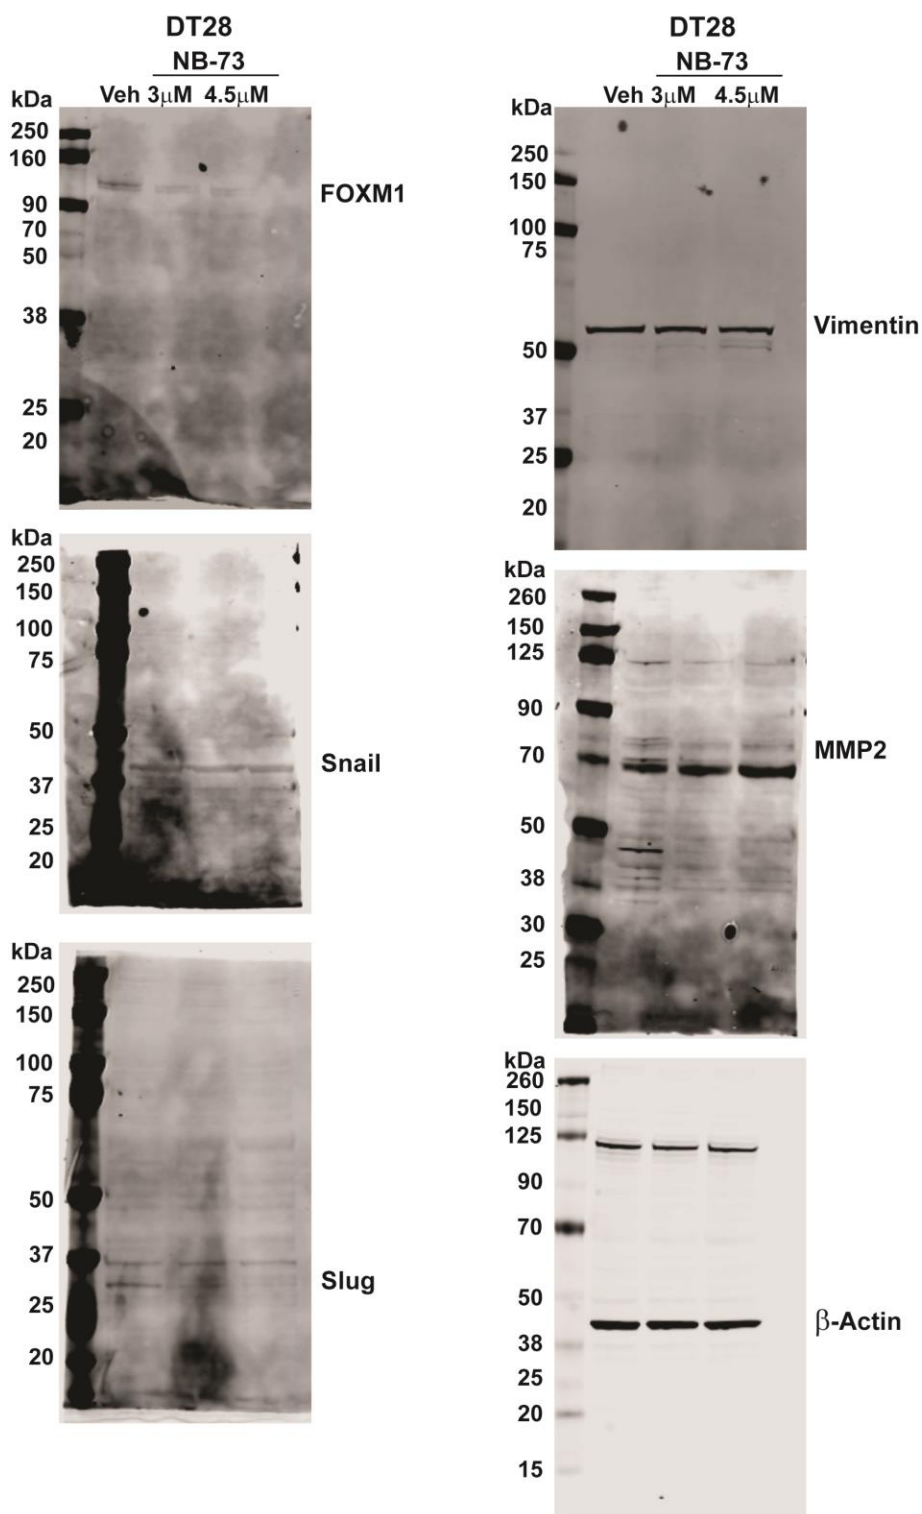

**Fig. S4A. Full Western Blots for the proteins shown in Figure 4B (left).** DT28 cells were treated with vehicle or compound NB-73 at the concentrations indicated and blots were probed with antibody for the protein indicated. Molecular weight markers are shown in the left-most lane with their kDa noted.

# Supplementary Figure S4B

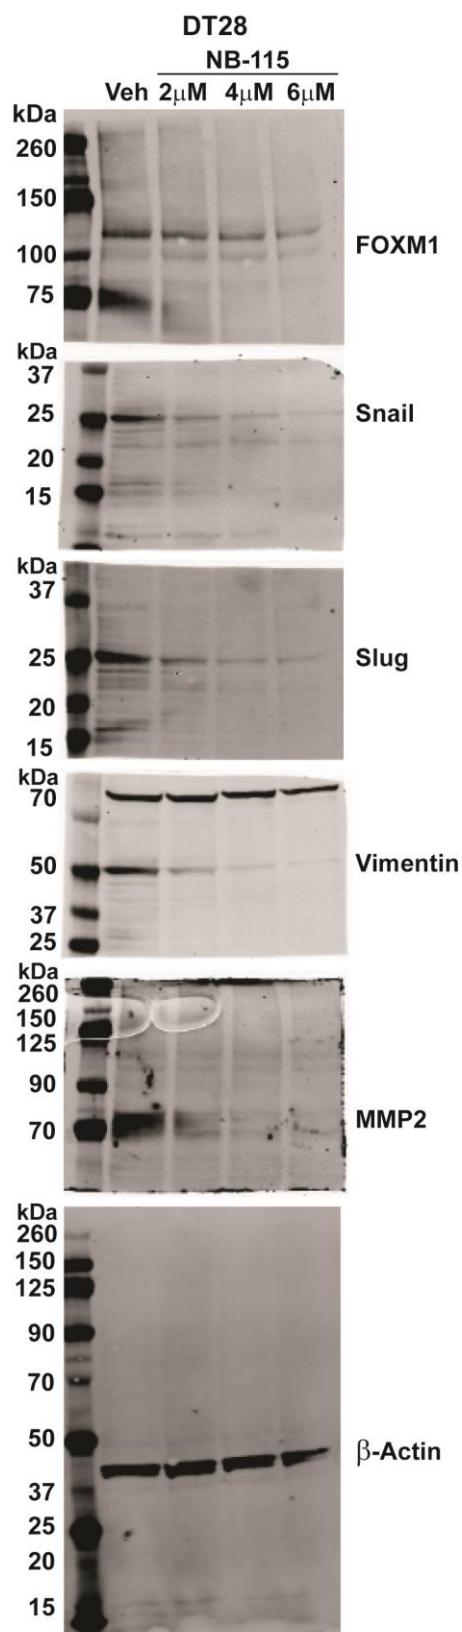

**Fig. S4B. Full Western Blots for the proteins shown in Figure 4B (right).** DT28 cells were treated with vehicle or compound NB-115 at the concentrations indicated and blots were probed with antibody for the protein indicated. Molecular weight markers are shown in the left-most lane with their kDa noted.
